# Supplementary material for: ApoE4 attenuates autophagy via FoxO3a repression in the brain
Source: PubMed Central journal article supplement (PMC8413297; doi:10.1038/s41598-021-97117-6), 2021-09-02
Supplement: 41598_2021_97117_MOESM1_ESM.pdf [file 41598_2021_97117_MOESM1_ESM.pdf]

# **ApoE4 attenuates autophagy via FoxO3a repression in the brain**

Hee-Young Sohn<sup>1, 3</sup>, Seong-Ik Kim<sup>2</sup>, Jee-Yun Park<sup>1</sup>, Sung-Hye Park<sup>2</sup>, Young Ho Koh<sup>1</sup>,  
Joon Kim<sup>3\*</sup> and Chulman Jo<sup>1\*</sup>

<sup>1</sup>Division of Brain Disease Research, Department for Chronic Disease Convergence Research, Korea National Institute of Health, 187 Osongsaengmyeong2-ro, Osong-eup, Cheongju-si, Chungcheongbuk-do 28159, Republic of Korea

<sup>2</sup>Department of Pathology, Seoul National University College of Medicine, Seoul 03080, Republic of Korea

<sup>3</sup>Laboratory of Biochemistry, Division of Life Sciences, Korea University, Seoul 02841, Republic of Korea

\* These authors contributed equally to this work.

E-mail: joonkim@korea.ac.kr; chulmanjo@gmail.com

# Supporting Information

## Supplementary Materials and Methods

### Plasmids

Human ApoE3 cDNA clone (NM\_00041) in pCMV6 with C-terminal Myc Tag was purchased from OriGene Technologies. Site-directed mutagenesis was used to generate human ApoE4 (T388C) cDNA clone and confirmed by DNA sequencing. Human FoxO3a plasmid was a gift from Dr. Min-Ju Kim (Hallym University, Korea).

### Immunohistochemical staining

Human brain tissue sections were cut into 3  $\mu\text{m}$  thickness for immunohistochemistry, which was carried out on BenchMark ULTRA (Ventana-Roche). For amyloid- $\beta$  immunostaining, heat-induced antigen retrieval in cell conditioning 1 (CC1) buffer (Roche) was performed at 100°C for 32 min. The tissues were then incubated at 37°C for 32 min with a mouse monoclonal amyloid- $\beta$  antibody 6E10 (BioLegend, 803001), followed by incubation with a biotinylated secondary antibody at 37°C for 8 min. The staining results were evaluated under a light microscope (Olympus BX40).

### **Cell culture**

HEK293 cells were purchased from the ATCC. Cells were cultured in Dulbecco's modified Eagle's medium (Gibco) supplemented with 10% FBS (Gibco) and 1% penicillin/streptomycin (Gibco) at 37 °C in a humidified atmosphere containing 5% CO<sub>2</sub>.

### **Co-immunoprecipitation**

HEK293 cells were transiently transfected with Myc-ApoE3 or Myc-ApoE4 and FoxO3a expression plasmids, for 24 h. Cells were lysed NP-40 lysis buffer (0.5% NP-40, 10 mM Tris-HCl [pH 8.0], 150 mM NaCl, 10 mM sodium pyrophosphate, 1 mM EDTA) containing 1 mM NaF, 1 mM Na<sub>3</sub>VO<sub>4</sub>, and 1x protease inhibitor cocktail (Sigma-Aldrich). The cell lysates were used for ApoE immunoprecipitation using an anti-Myc antibody (Cell signaling, 2276). The protein level of FoxO3a co-immunoprecipitated with ApoE was examined by immunoblotting using an anti-FoxO3a antibody (Cell signaling, 2497).

## Supplementary Table

**Supplementary Table** The patient's epidemiological information of human brain specimens

| No. | Specimens     | Age | Sex | PMI(h) | Diagnosis | Braak stage | APOE genotype |
|-----|---------------|-----|-----|--------|-----------|-------------|---------------|
| 1   | Non-carrier 1 | 56  | M   | 3      | PART      |             | E3/E3         |
| 2   | Non-carrier 2 | 50  | M   | 8      | ARTAG     |             | E3/E3         |
| 3   | Non-carrier 3 | 75  | F   | 5      | AD        | III         | E3/E3         |
| 4   | Non-carrier 4 | 55  | M   | 9      | Normal    |             | E3/E3         |
| 5   | Non-carrier 5 | 93  | F   | 13     | AD        | IV          | E3/E3         |
| 6   | Non-carrier 6 | 61  | M   | 12.5   | PART      |             | E3/E3         |
| 7   | Non-carrier 7 | 74  | M   | 5.3    | PART      |             | E2/E3         |
| 8   | E4 Carrier 1  | 75  | F   | 8      | AD        | V or VI     | E3/E4         |
| 9   | E4 Carrier 2  | 94  | F   | 7      | AD        | IV or V     | E2/E4         |
| 10  | E4 Carrier 3  | 69  | M   | 7      | AD        | II          | E3/E4         |
| 11  | E4 Carrier 4  | 83  | F   | 9.5    | VD        |             | E3/E4         |
| 12  | E4 Carrier 5  | 85  | F   | 7      | AD        | IV          | E3/E4         |

**NOTE.** PMI, Post-Mortem Interval; PART, Primary age-related tauopathy; AD, Alzheimer's Disease; ARTAG, Aging-related tau astroglipathy; VD, Vascular Dementia

## Supplementary Figure S1

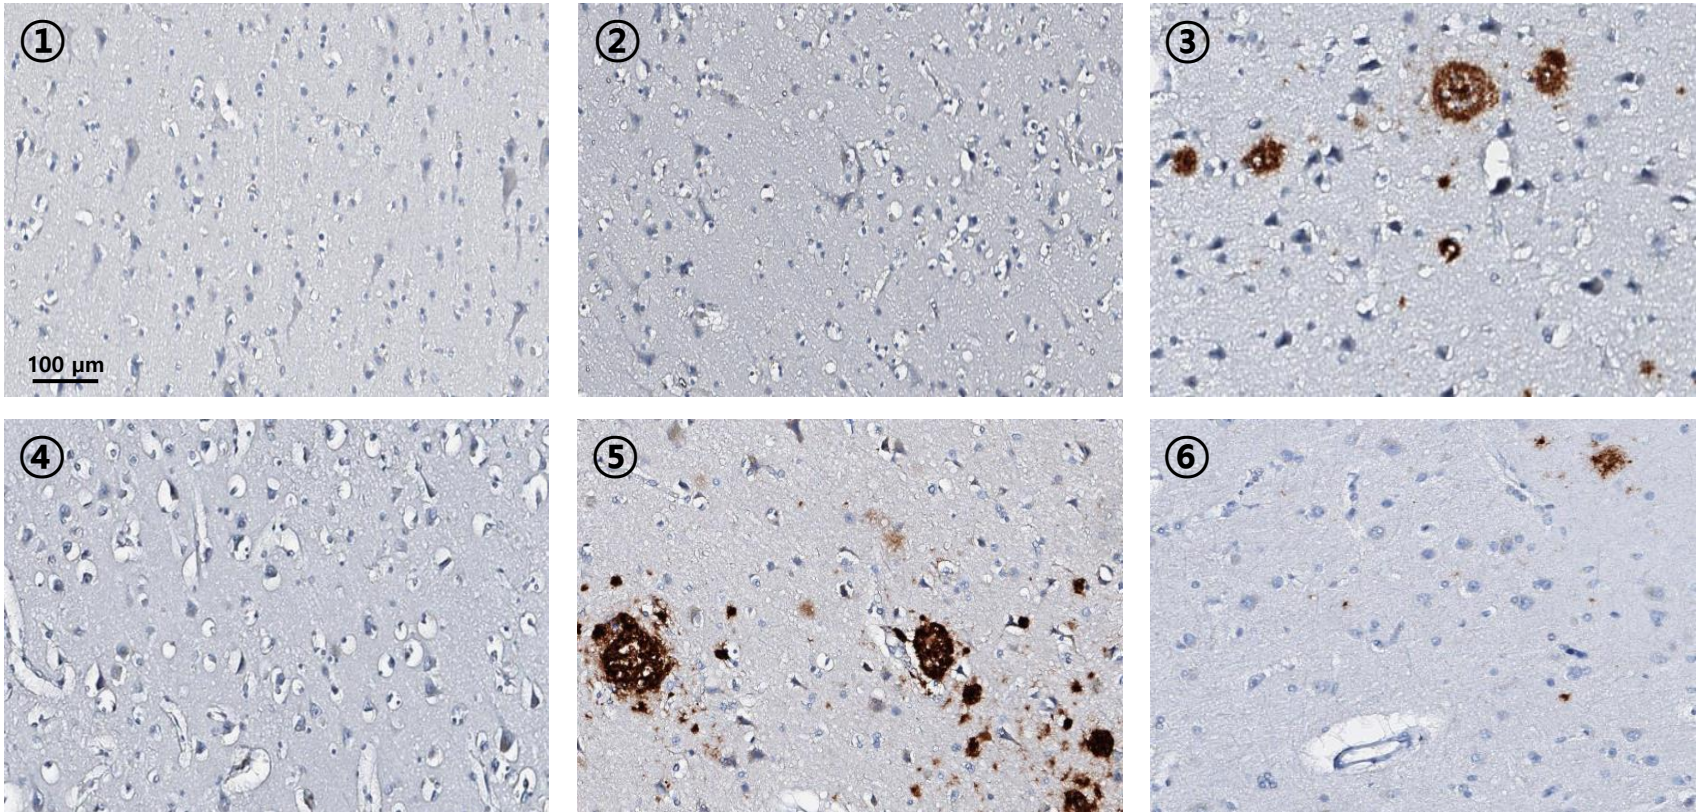

**Supplementary Fig. S1. Immunohistochemical staining of  $\beta$ -amyloid plaques in postmortem human brains.** Immunohistochemistry analyses were performed on the same brain region (superior frontal gyrus) of ApoE4 non-carriers (① ~ ⑦) and carriers (⑧ ~ ⑫). Scale bars 100  $\mu$ m.

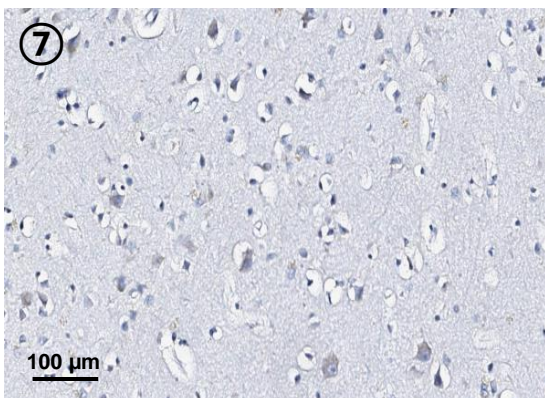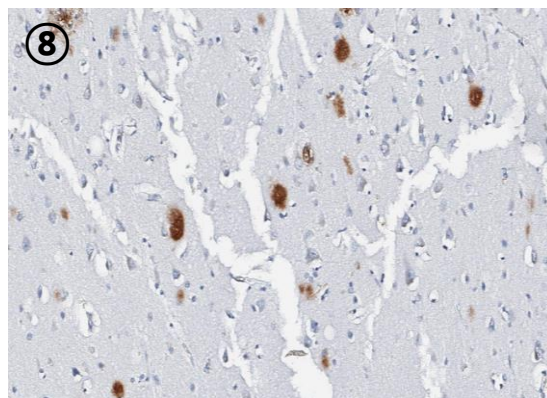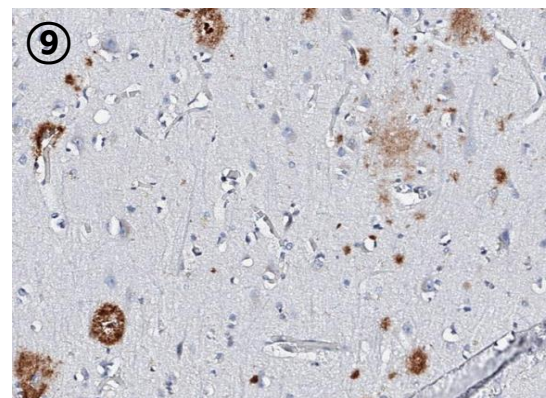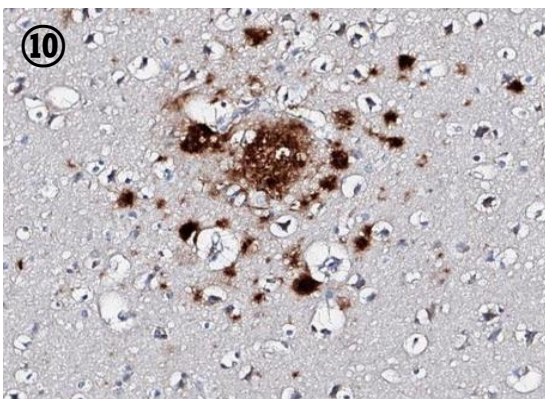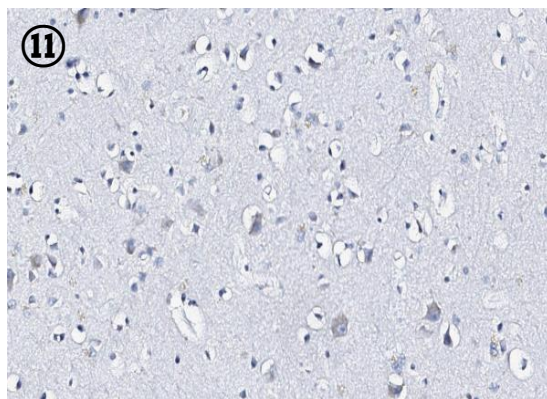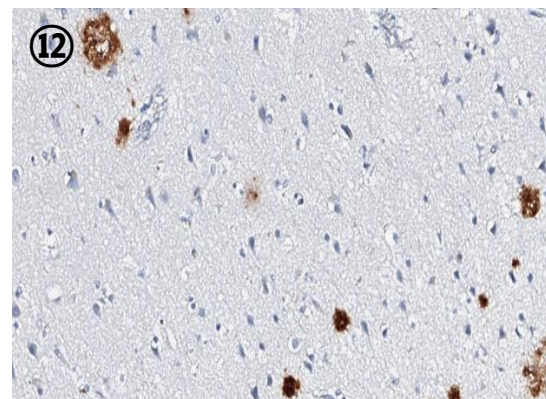

Supplementary Fig. S1 continued

## Supplementary Figure S2

**A**

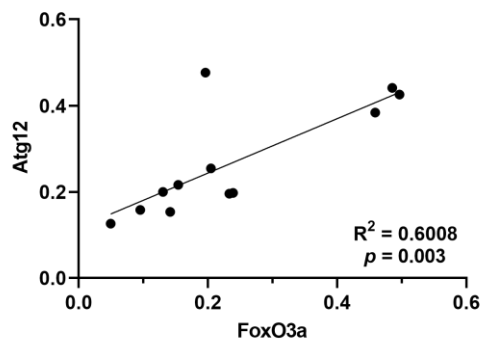

**B**

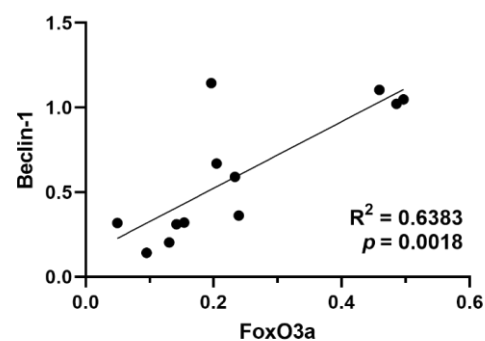

**C**

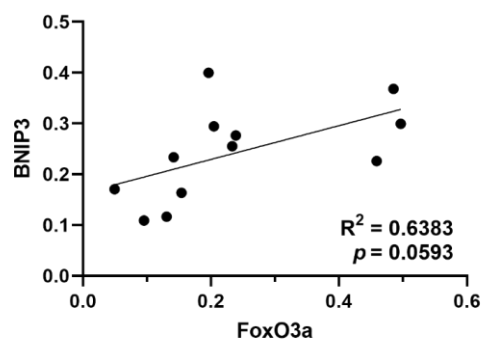

**D**

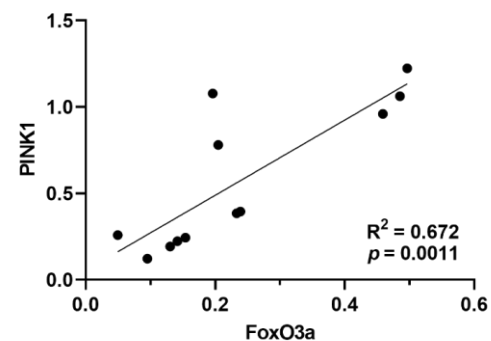

**Supplementary Fig. S2.** The protein level of FoxO3a was positively correlated with those of its downstream genes. (A) FoxO3a showed positive correlations with Atg12 ( $R^2 = 0.6008$ ;  $p = 0.003$ ), (B) Beclin-1 ( $R^2 = 0.6383$ ;  $p = 0.0018$ ), (C) BNIP3 ( $R^2 = 0.6383$ ;  $p = 0.0593$ ), and (D) PINK1 ( $R^2 = 0.672$ ;  $p = 0.0011$ ). Data were analyzed with Pearson's correlation test (ApoE4 carriers  $n = 5$ , non-carriers  $n = 7$ ). Linear regressions are shown as solid lines.

## Supplementary Figure S3

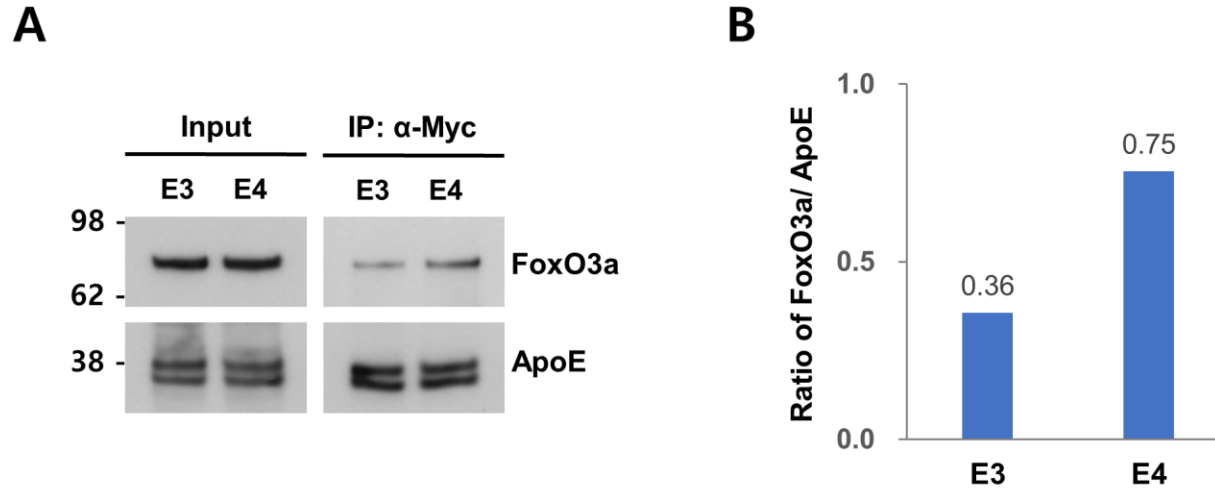

**Supplementary Fig. S3. FoxO3a associated with ApoE4.** (A) HEK293 cells were co-transfected with Myc-tagged ApoE3 (E3) or ApoE4 (E4) and FoxO3a plasmids. On the next day, the protein levels of FoxO3a co-immunoprecipitated with ApoE were analyzed by immunoblotting. Full blots are provided in Supplementary Fig. S4. (B) Bar graph shows relative ratio of FoxO3a co-immunoprecipitated with ApoE3 or ApoE4.



# Supplementary Figure S4

Full-length blots of Fig. 1A

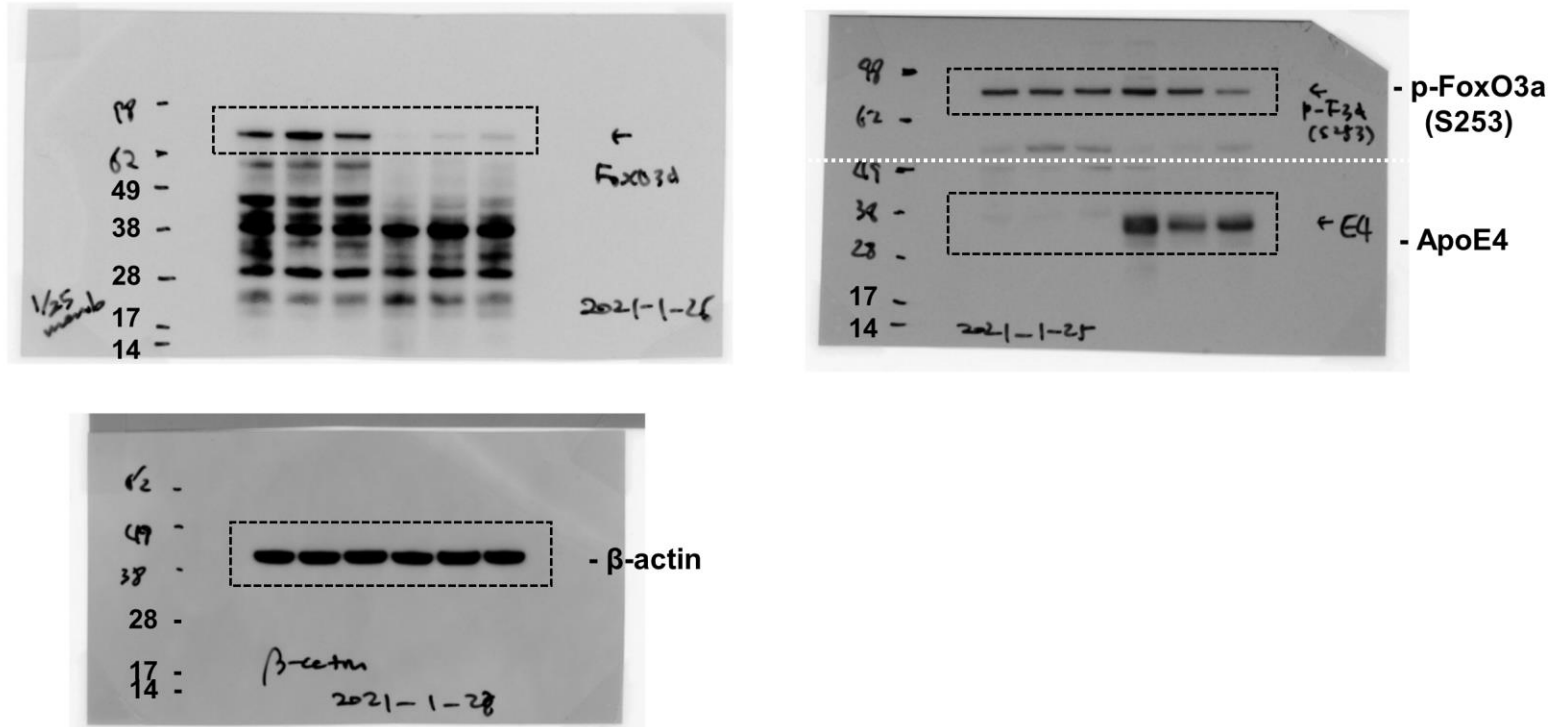

**Supplementary Fig. S4. Uncropped immunoblotting images.** The dashed boxes indicate the cropped position of membranes in figures. Cutting of membranes for hybridization with different antibodies is indicated by white dotted lines.

Full-length blots of Fig. 2A

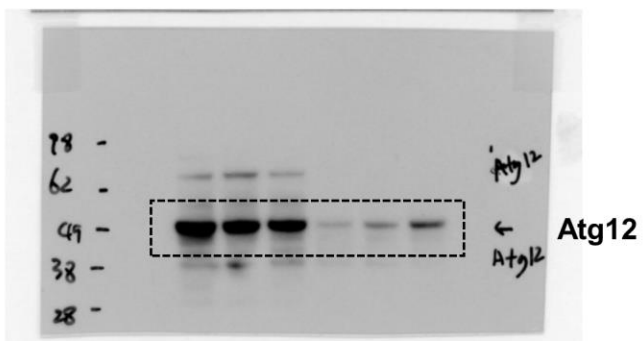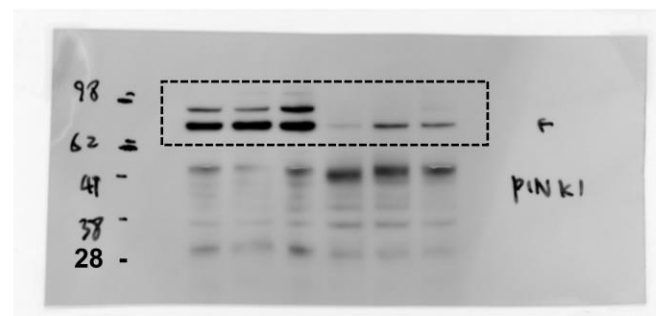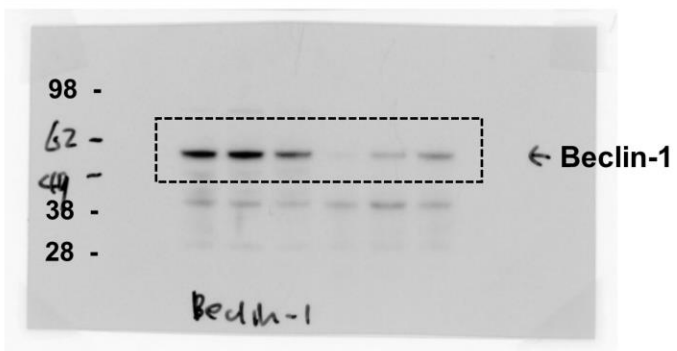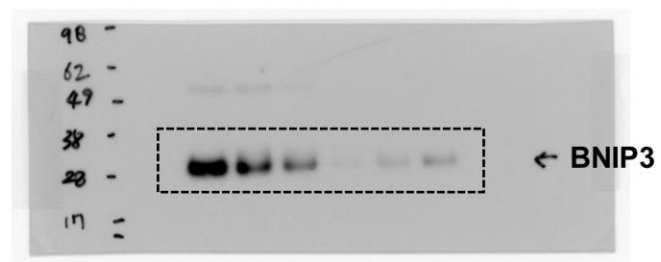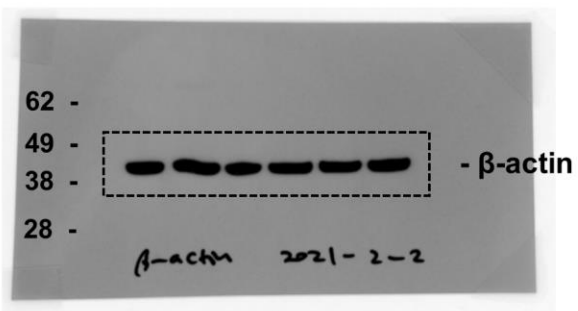

Full-length blots of Fig. 3A

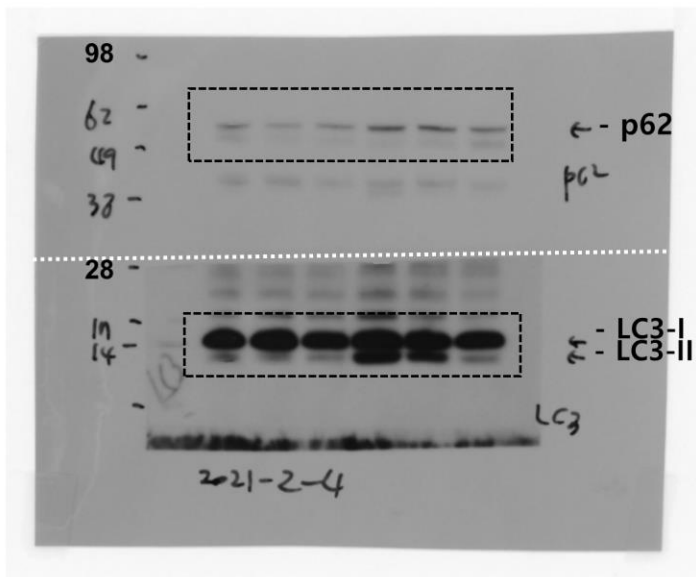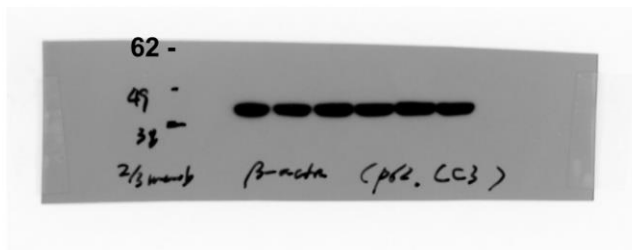

Full-length blots of Fig. 3B

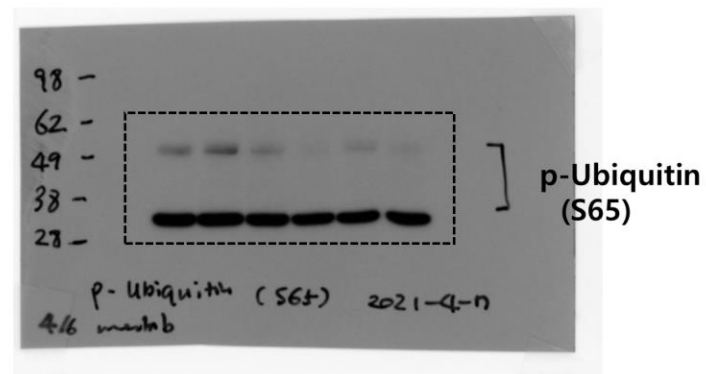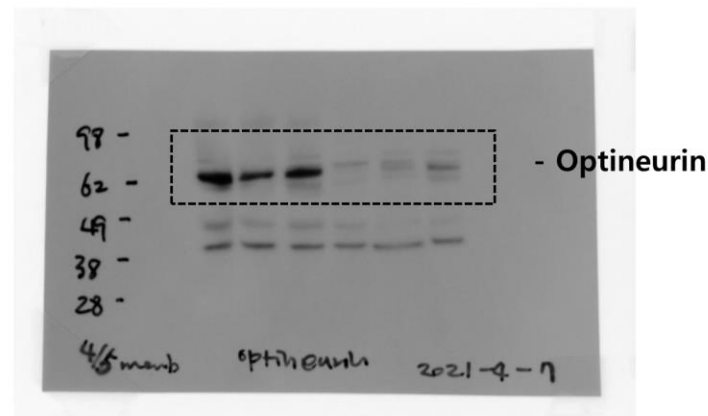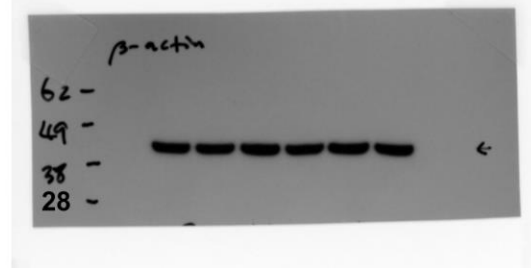

Full-length blots of Fig. 4A

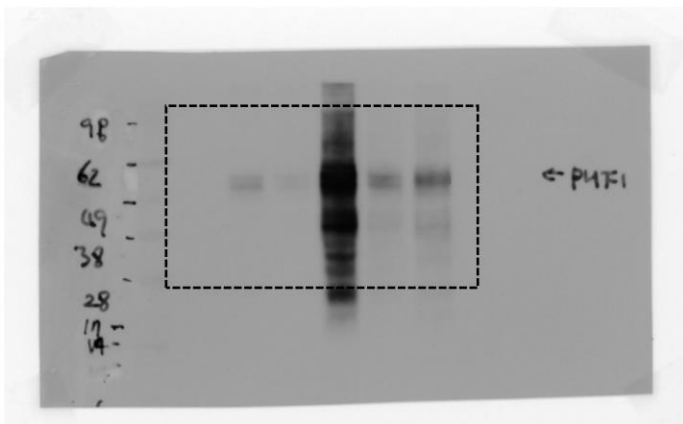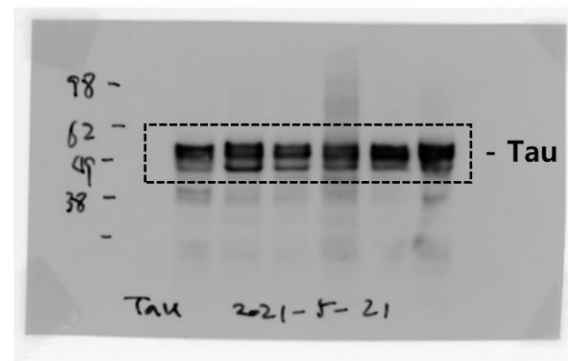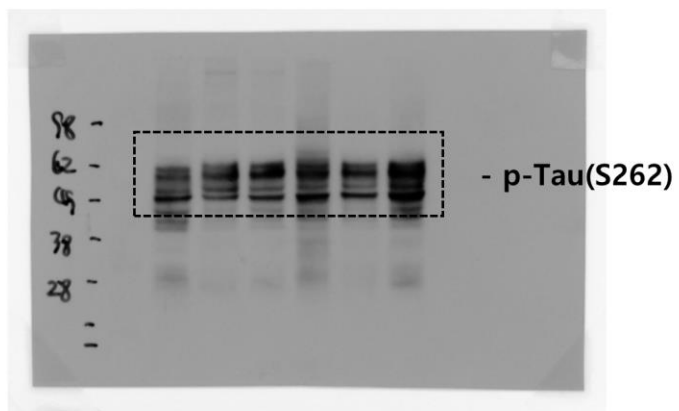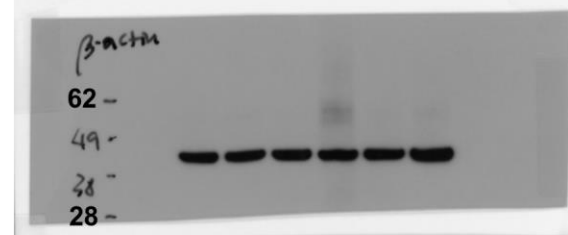

Supplementary Fig. S4 continued

Full-length blots of Fig. S3A

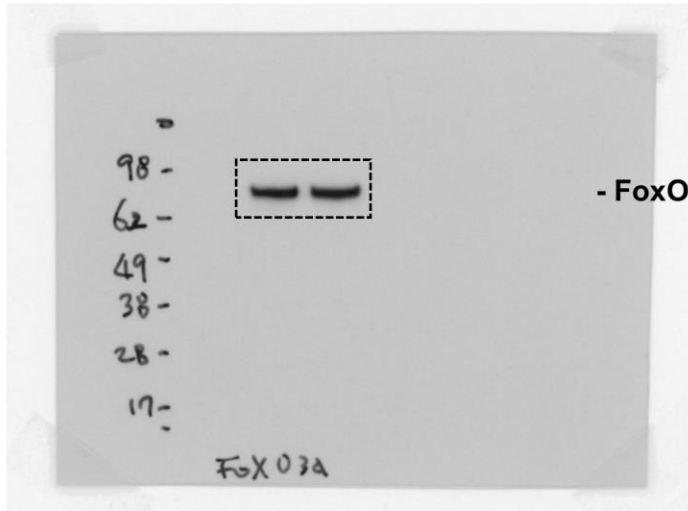

short exposure

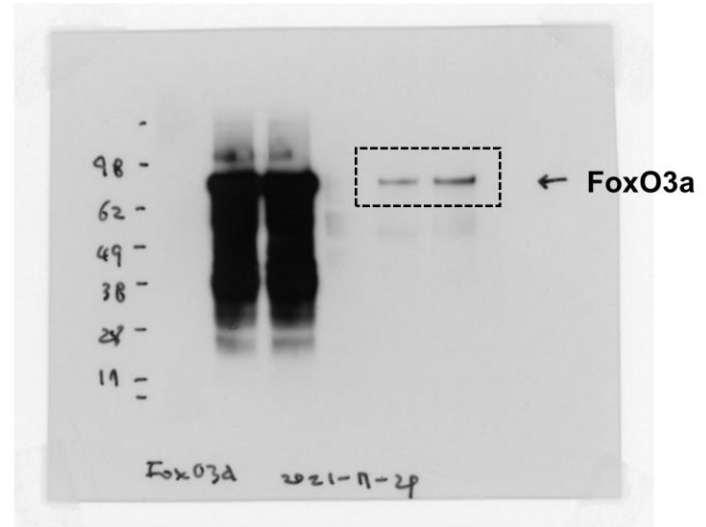

Long exposure

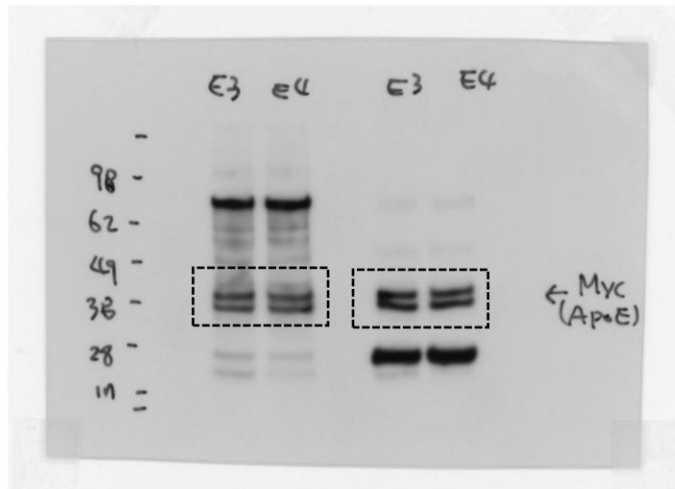

← This blot was reprobed with anti-Myc antibody following FoxO3a immunoblotting using anti-FoxO3 antibody.
